# Supplementary material for: A novel computational approach to the silencing of Sugarcane Bacilliform Guadeloupe A Virus determines potential host-derived MicroRNAs in sugarcane (Saccharum officinarum L.)
Source: PeerJ. 2020 Jan 13;8:e8359. doi: 10.7717/peerj.8359 (PMC6964690; doi:10.7717/peerj.8359)
Supplement: Table S2 — Sugarcane-encoded miRNAs predicted from all four algorithms. Genome positions and the output parameters including minimum free energy, folding energy and expectation have been included. [file peerj-08-8359-s003.xlsx]

## Sheet: Sheet1
miRNA Name	Position (miRanda)	Position (RNA22)	Position RNAhybrid	Position (psRNATarget)	MFE -kcal/mol (miRanda)	MFE -kcal/mol (RNA22)	MFE (RNAhybrid)	Expectation (psRNATarget)
sof-miR156			7104				-23.2
sof-miR156(1)
sof-miR159a	5282		1659	3779	-17.18		-25.4	6
sof-miR159a (1)	6739				-18.11
sof-miR159b	5282		1659	3779	-17.18		-25.4	6
sof-miR159b (1)	6739				-18.11
sof-miR159c	6739		6896	3779	-16.7		-28	6
sof-miR159d	5282		1659	3779	-17.18		-25.4	6
sof-miR159d (1)	6739				-18.11
sof-miR159e	5282		733		-15.81		-25.5
sof-miR167a	5846	1310	1304	5846	-16.08	-15.8	-26.6	7
sof-miR167b	5846	1310	1304	5846	-16.08	-15.8	-26.6	7
sof-miR168a	5506	5506	6084		-21.24	-17.7	-25.6
sof-miR168a (1)	7050	7050			-18.45	-17.7
sof-miR168a (2)		5137				-14.3
sof-miR168b	7050	7050	6937		-20.05	-19.4	-25.6
sof-miR168b(1)		5506				-13.7
sof-miR396	3394	3394	3394	5732	-19.99	-17.8	-24.9	5.5
sof-miR396 (1)		4115				-14.2
sof-miR408a		1735	5136			13.7	-27.6
sof-miR408b		1735	5136			13.7	-27.6
sof-miR408c		1735	5136			13.7	-27.6
sof-miR408d		1735	5136			13.7	-27.6
sof-miR408e			6152				-28.9
ssp-miR166	3249		5572	981	-21.45		-26.7	6.5
ssp-miR166(1)	5589				-17.54
ssp-miR166(3)	5761				-21.74
ssp-miR169			752				-24.8
ssp-miR437a			978				-21.7
ssp-miR437b			6829				-21.8
ssp-miR437c			978				-24.3
ssp-miR528	7426	1310	7407	2897	-18.37	-13.7	-28	6.5
ssp-miR528(1)	7395				-18.05
ssp-miR827	5378		3010		-16.4		-24
ssp-miR444a		4103	774	775		-16.3	-27.6	6.75
ssp-miR444b		4103	774	756		-16.3	-27.6	6
ssp-miR444b (1)				2615				6.5
ssp-miR444b (2)				5009				6.5
ssp-miR444b (3)				5731				6.5
ssp-miR444c-3p			774	4940			-26.7	6.5
ssp-miR1128	6141		6148		-22.96		-27.8
ssp-miR1432	6070		1301		-15.48		-20.4
