# Supplementary material for: A novel computational approach to the silencing of Sugarcane Bacilliform Guadeloupe A Virus determines potential host-derived MicroRNAs in sugarcane (Saccharum officinarum L.)
Source: PeerJ. 2020 Jan 13;8:e8359. doi: 10.7717/peerj.8359 (PMC6964690; doi:10.7717/peerj.8359)
Supplement: Table S3 [file peerj-08-8359-s004.xlsx]

## Sheet: Sheet1
miRNA Name	Position (miRanda)	Genes	Position (RNA22)	Genes	Position RNAhybrid	Genes	Position (psRNATarget)	Genes	MFE -kcal/mol (miRanda)	Folding Energy -kcal/mol (RNA22)	MFE (RNAhybrid)	Expectation (psRNATarget)
sof-miR156					7104						-23.2
sof-miR156(1)
sof-miR159a	5282	ORF3			1659	ORF3	3779	ORF3	-17.18		-25.4	6
sof-miR159a (1)	6739	ORF3							-18.11
sof-miR159b	5282	ORF3			1659	ORF3	3779	ORF3	-17.18		-25.4	6
sof-miR159b (1)	6739	ORF3							-18.11
sof-miR159c	6739	ORF3			6896		3779	ORF3	-16.7		-28	6
sof-miR159d	5282	ORF3			1659	ORF3	3779	ORF3	-17.18		-25.4	6
sof-miR159d (1)	6739	ORF3							-18.11
sof-miR159e	5282	ORF3			733	ORF1			-15.81		-25.5
sof-miR167a	5846	ORF3	1310	ORF2	1304	ORF2	5846	ORF3	-16.08	-15.8	-26.6	7
sof-miR167b	5846	ORF3	1310	ORF2	1304	ORF2	5846	ORF3	-16.08	-15.8	-26.6	7
sof-miR168a	5506	ORF3	5137	ORF3	6084	ORF3			-21.24	-14.3	-25.6
sof-miR168a (1)	7050		5506	ORF3					-18.45	-17.7
sof-miR168a (2)			7050							-17.7
sof-miR168b	7050		7050		6937				-20.05	-19.4	-25.6
sof-miR168b(1)			5506	ORF3
sof-miR396	3394	ORF3	4115	ORF3	3394	ORF3	5732	ORF3	-19.99	-14.2	-24.9	5.5
sof-miR396 (1)			3394	ORF3						-17.8
sof-miR408a			1735	ORF3	5136	ORF3				13.7	-27.6
sof-miR408b			1735	ORF3	5136	ORF3				13.7	-27.6
sof-miR408c			1735	ORF3	5136	ORF3				13.7	-27.6
sof-miR408d			1735	ORF3	5136	ORF3				13.7	-27.6
sof-miR408e					6152	ORF3					-28.9
ssp-miR166	3249	ORF3			5572	ORF3	981	ORF1	-21.45		-26.7	6.5
ssp-miR166(1)	5589	ORF3							-17.54
ssp-miR166(2)	94								-16.67
ssp-miR166(3)	5761	ORF3							-21.74
ssp-miR169					752	ORF1					-24.8
ssp-miR437a					978	ORF1					-21.7
ssp-miR437b					6829	ORF3					-21.8
ssp-miR437c					978	ORF1					-24.3
ssp-miR528	7426		1310	ORF2	7407		2897	ORF3	-18.37	-13.7	-28	6.5
ssp-miR528(1)	7395								-18.05
ssp-miR827	5378	ORF3			3010	ORF3			-16.4		-24
ssp-miR444a			4103	ORF3	774	ORF1	775	ORF1		-16.3	-27.6	6.75
ssp-miR444b			4103	ORF3	774	ORF1	756	ORF1		-16.3	-27.6	6
ssp-miR444b (1)							2615	ORF3				6.5
ssp-miR444b (2)							5009	ORF3				6.5
ssp-miR444b (3)							5731	ORF3				6.5
ssp-miR444c-3p					774	ORF1	4940	ORF3			-26.7	6.5
ssp-miR1128	6141	ORF3			6148	ORF3			-22.96		-27.8
ssp-miR1432	6070	ORF3			1301	ORF1			-15.48		-20.4
