# Supplementary material for: A novel computational approach to the silencing of Sugarcane Bacilliform Guadeloupe A Virus determines potential host-derived MicroRNAs in sugarcane (Saccharum officinarum L.)
Source: PeerJ. 2020 Jan 13;8:e8359. doi: 10.7717/peerj.8359 (PMC6964690; doi:10.7717/peerj.8359)
Supplement: Table S4 — Consensus sugarcane-encoded miRNA were selected from all four algorithms. [file peerj-08-8359-s005.xlsx]

## Sheet: Sheet1
miRNA Name	miRanda	RNA22	RNAhybrid	psRNATarget
sof-miR156	sof-miR159a	sof-miR167a	sof-miR156	sof-miR159a
sof-miR159a	sof-miR159b	sof-miR167b	sof-miR159a	sof-miR159b
sof-miR159b	sof-miR159c	sof-miR168a	sof-miR159b	sof-miR159c
sof-miR159c	sof-miR159d	sof-miR168b	sof-miR159c	sof-miR159d
sof-miR159d	sof-miR159e	sof-miR396	sof-miR159d	sof-miR167a
sof-miR159e	sof-miR167a	sof-miR408a	sof-miR159e	sof-miR167b
sof-miR167a	sof-miR167b	sof-miR408b	sof-miR167a	sof-miR396
sof-miR167b	sof-miR168a	sof-miR408c	sof-miR167b	ssp-miR166
sof-miR168a	sof-miR168b	sof-miR408d	sof-miR168a	ssp-miR528
sof-miR168b	sof-miR396	ssp-miR528	sof-miR168b	ssp-miR444a
sof-miR396	ssp-miR166	ssp-miR444a	sof-miR396	ssp-miR444b
sof-miR408a	ssp-miR528	ssp-miR444b	sof-miR408a	ssp-miR444c-3p
sof-miR408b	ssp-miR827	12	sof-miR408b	12
sof-miR408c	ssp-miR1128		sof-miR408c
sof-miR408d	ssp-miR1432		sof-miR408d
sof-miR408e	15		sof-miR408e
ssp-miR166			ssp-miR166
ssp-miR169			ssp-miR169
ssp-miR437a			ssp-miR437a
ssp-miR437b			ssp-miR437b
ssp-miR437c			ssp-miR437c
ssp-miR528			ssp-miR528
ssp-miR827			ssp-miR827
ssp-miR444a			ssp-miR444a
ssp-miR444b			ssp-miR444b
ssp-miR444c-3p			ssp-miR444c-3p
ssp-miR1128			ssp-miR1128
ssp-miR1432			ssp-miR1432
28			28
